# Supplementary material for: Unraveling a molecular determinant for clathrin-independent internalization of the M2 muscarinic acetylcholine receptor
Source: PubMed Central journal article supplement (PMC4476042; doi:10.1038/srep11408), 2015-06-22
Supplement: srep11408-s1.pdf [file srep11408-s1.pdf]

## Supplementary Information

### Unraveling a molecular determinant for clathrin-independent internalization of the M2 muscarinic acetylcholine receptor

Min Wan<sup>1,\*</sup>, Wenhua Zhang<sup>1,\*</sup>, Yangli Tian<sup>1</sup>, Chanjuan Xu<sup>1</sup>, Tao Xu<sup>1,2</sup>, Jianfeng Liu<sup>1,†</sup>, and Rongying Zhang<sup>1,†</sup>

<sup>1</sup>Key Laboratory of Molecular Biophysics of the Ministry of Education, College of Life Science and Technology, Huazhong University of Science and Technology, Wuhan, Hubei, China

<sup>2</sup>National Laboratory of Biomacromolecules, Institute of Biophysics, Chinese Academy of Sciences, Beijing, China

\*These authors contributed equally to this work.

†To whom correspondence should be addressed. E-mail: [ryzhang@hust.edu.cn](mailto:ryzhang@hust.edu.cn) or [jfliu@mail.hust.edu.cn](mailto:jfliu@mail.hust.edu.cn)

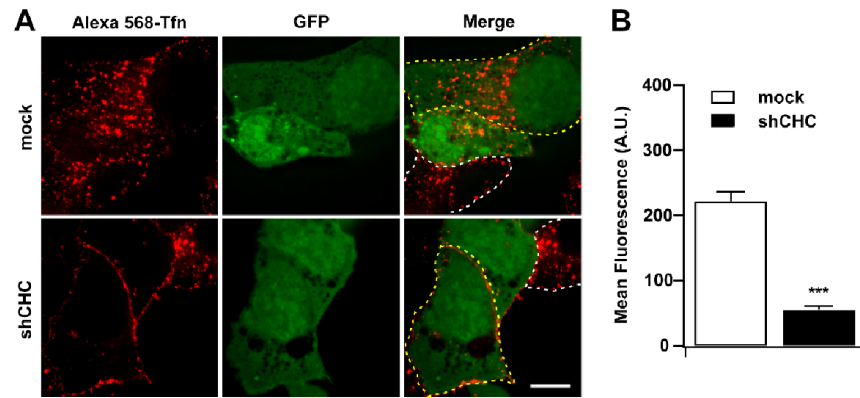

**Figure S1 | CHC-depletion blocked uptake of Tfn in HEK293 cells.** (A) Representative images of Alexa 568-Tfn distribution in cells transfected with GFP-tagged vector or shCHC. Alexa 568-Tfn uptake experiments were performed as described in "Methods". Cell contours were outlined, with yellow dash lines showing transfection-positive cells and white dash lines showing transfection-negative cells. Scale bar, 10  $\mu$ m. (B) Quantification of Tfn uptake in cells transfected with vector or shCHC. Mean  $\pm$  SEM of at least 40 cells from at least three independent experiments are shown. \*\*\* $p < 0.001$ .

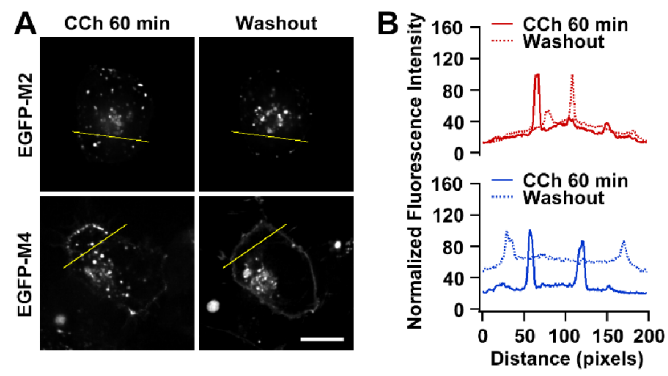

**Figure S2 | Analysis of EGFP-tagged M2 and M4 mAChR recycling in living HEK293 cells.**

(A) Representative live imaging of cells stimulated with CCh (100  $\mu$ M) and subsequent washout of 60 min. Scale bar, 10  $\mu$ m. (B) Linear profile analysis showed after washout for 60 min, M2 signals were still located intracellularly due to CCh-induction, but the M4 signals partially trans-located onto the plasma membrane.
